# Supplementary material
Source: PubMed Central journal article supplement (PMC3963125)
Supplement: cn4002126_si_001.pdf [file cn4002126_si_001.pdf]

## Supporting Information

**Table SI 1.** Docking data of selected tetracyclic compounds **17**, **21** and for tricyclic compounds **32**, **34**, **36**, **38**, **41** and **42**, compounds mentioned in the discussion, with comparable binding of the inhibitors to the enzyme with GoldScore and per-atom-score for the *R*-enantiomeric form.

| cpd | IC <sub>50</sub> ( <i>Ee</i> AChE) [ $\mu$ M] | # heavy atoms | position of tert. amine | GoldScore | per-atom-score |
|-----|-----------------------------------------------|---------------|-------------------------|-----------|----------------|
| 17  | 0.23                                          | 33            | CAS                     | 106.63    | 3.23           |
| 21  | 0.25                                          | 31            | CAS                     | 103.87    | 3.35           |
| 32  | 0.07                                          | 24            | CAS                     | 96.51     | 4.02           |
| 34  | 0.39                                          | 27            | CAS                     | 101.39    | 3.76           |
| 36  | 0.51                                          | 23            | CAS                     | 100.78    | 4.38           |
| 38  | 0.41                                          | 26            | CAS                     | 112.53    | 4.33           |
| 41  | 0.07                                          | 23            | CAS                     | 94.50     | 4.11           |
| 42  | 0.09                                          | 26            | CAS                     | 105.29    | 4.05           |
